# Supplementary material for: Sensory Modality and Spoken Language Shape Reading Network in Blind Readers of Braille
Source: bioRxiv or medRxiv preprint supplement (doi:10.1101/2021.08.24.457544), 2022-05-09
Supplement: Supplementary file [file media-1.pdf]

## Supplementary Results

### *Visual (sighted) but not tactile Braille reading (blind) elicits a posterior-to-anterior functional gradient in left vOTC and shows left-lateralization*

We first conducted a four-way hemisphere (left, right) by posterior/anterior subregion (posterior, middle, anterior) by lexicality (words, consonant strings, control) by group (sighted, blind) ANOVA to examine reading responses across groups.

This ANOVA revealed a significant hemisphere (left hemisphere > right hemisphere,  $F_{(1, 32)} = 8.414, p < 0.01$ ), posterior/anterior subregion (posterior and middle > anterior,  $F_{(2, 64)} = 9.74, p < 0.001$ ), and lexicality main effect (words and consonant strings > controls,  $F_{(2, 64)} = 14.31, p < 0.001$ ). There was no group main effect ( $F_{(1, 32)} = 0.732, p = 0.399$ ). For the two way interaction, the group by lexicality ( $F_{(2, 64)} = 12.013, p < 0.001$ ), group by posterior/anterior subregion ( $F_{(2, 64)} = 12.161, p < 0.001$ ), hemisphere by lexicality ( $F_{(2, 64)} = 42.846, p < 0.001$ ) and the posterior/anterior subregion by lexicality ( $F_{(4, 128)} = 9.237, p < 0.001$ ) interaction effect were significant. There were no hemisphere by group interaction effect ( $F_{(1, 32)} = 0.748, p = 0.394$ ) or hemisphere by posterior/anterior subregion interaction effect ( $F_{(1, 32)} = 1.44, p = 0.244$ ). For the three way interaction, the hemisphere by posterior/anterior subregion by group interaction ( $F_{(2, 64)} = 3.72, p < 0.01$ ), the posterior/anterior subregion by lexicality by group interaction ( $F_{(4, 129)} = 3.26, p < 0.05$ ), and the hemisphere by posterior/anterior subregion by lexicality interaction ( $F_{(4, 129)} = 3.516, p < 0.01$ ) effect were significant. Neither the hemisphere by lexicality by group interaction ( $F_{(2, 64)} = 2.165, p = 0.123$ ) nor the hemisphere by posterior/anterior subregion by lexicality interaction were significant. The four way interaction have been reported in main context.
